# Supplementary material for: Training to improve contrast sensitivity in amblyopia: correction of high-order aberrations
Source: PubMed Central journal article supplement (PMC5067678; doi:10.1038/srep35702), 2016-10-18
Supplement: srep35702-s1.pdf [file srep35702-s1.pdf]

Supplementary Information:

**Training to improve contrast sensitivity in amblyopia: correction of high-order aberrations**

Meng Liao, Haoxing Zhao, Longqian Liu, Qian Li, Yun Dai, Yudong Zhang, Yifeng Zhou

| Subject | name | Age(years)/Sex | Refraction      |                 | Visual acuity (logMAR) |            | Training spatial frequency(c/deg) | Training sessions |
|---------|------|----------------|-----------------|-----------------|------------------------|------------|-----------------------------------|-------------------|
|         |      |                | Amblyopic eye   | Fellow eye      | Amblyopic eye          | Fellow eye |                                   |                   |
| 1       | LJN  | 13/F           | +8.00/+0.50×90  | +0.50           | 1                      | 0          | 8                                 | 9                 |
| 2       | YZ   | 11/F           | +4.00/+0.50×85  | plano           | 1                      | 0          | 10                                | 10                |
| 3       | ZCY  | 15/M           | +4.00/+3.00×100 | -1.00×180       | 0.57                   | 0          | 3.5                               | 9                 |
| 4       | PJY  | 14/M           | +2.50/+0.50×165 | -2.50           | 0.43                   | -0.15      | 8                                 | 10                |
| 5       | LC   | 14/F           | +4.50/+1.50×75  | -0.50/-0.50×180 | 0.30                   | -0.18      | 16                                | 17                |
| 6       | ZYJ  | 23/F           | +3.00/+1.00×90  | -1.75           | 0.22                   | 0.05       | 18                                | 10                |
| 7       | GF   | 16/F           | +2.25/+0.50×90  | -1.75/0.50×5    | 0.3                    | 0          | 12                                | 9                 |
| 8       | SJY  | 14/F           | +3.50/+1.50×95  | -1.00×170       | 0.22                   | -0.08      | 18                                | 9                 |
| 9       | TGW  | 14/M           | +4.50/+2.00×90  | -1.00           | 0.57                   | -0.18      | 9                                 | 11                |
| 10      | XQ   | 12/F           | +1.00/+2.00×85  | -0.5/-1.00×10   | 0.40                   | 0.05       | 15                                | 10                |
| 11      | LHH  | 19/M           | +4.50/+1.00×90  | +2.25/+1.00×70  | 0.70                   | 0.00       | 10                                | 9                 |
| 12      | ZWY  | 14/F           | +4.00/+2.00×90  | -3.50/0.50×180  | 0.52                   | 0.00       | 13                                | 10                |
| 13      | TJ   | 26/F           | +1.50/+2.00×105 | -1.50           | 0.12                   | -0.06      | 22                                | 10                |
| 14      | LFT  | 11/M           | +3.00/-3.50×180 | plano           | 0.15                   | -0.08      | 24                                | 10                |
| 15      | ZCH  | 12/M           | -3.50/-3.50×10  | +0.50           | 0.18                   | 0.03       | 16                                | 10                |
| 16      | ZM   | 14/F           | +5.50           | plano           | 0.70                   | 0.00       | 13                                | 10                |
| 17      | LD   | 15/M           | +0.50/+2.50×90  | +0.50/+0.50×90  | 0.57                   | -0.08      | 16                                | 10                |
| 18      | LXC  | 12/M           | +5.00           | -0.50           | 0.36                   | -0.08      | 13                                | 10                |
| 19      | SLL  | 18/F           | +5.00/+0.75×110 | -0.50×160       | 0.70                   | -0.03      | 15                                | 10                |
| 20      | LYY  | 20/F           | +6.00/+1.50×50  | +5.00/+2.75×120 | 0.40                   | 0.10       | 8                                 | 10                |
| 21      | LYB  | 26/M           | +10.00/+2.00×90 | plano           | 0.40                   | -0.14      | 20                                | 11                |
| 22      | LYQ  | 13/F           | +4.50           | plano           | 0.34                   | -0.08      | 12                                | 10                |
| 23      | WYT  | 14/F           | +3.00/+2.00×110 | -0.75           | 0.40                   | -0.15      | 12                                | 10                |
| 24      | GWL  | 14/F           | +5.00/+2.00×80  | -0.50/-0.50×165 | 0.70                   | -0.08      | 8                                 | 9                 |
| 25      | TYY  | 30/F           | +5.00/+1.50×180 | +0.50           | 0.27                   | -0.08      | 18                                | 13                |
| 26      | LJH  | 17/F           | +4.00/+1.00×180 | +3.00           | 0.20                   | 0.00       | 20                                | 9                 |

**Table S1. Clinical summary of the subjects.**
